# Supplementary material for: Gene expression links functional networks across cortex and striatum
Source: PubMed Central journal article supplement (PMC5897339; doi:10.1038/s41467-018-03811-x), 2018-04-12
Supplement: 41467_2018_3811_MOESM2_ESM.pdf [file 41467_2018_3811_MOESM2_ESM.pdf]

## Description of Additional Supplementary Files

**File Name:** Supplementary Data 1

**Description:** Sheets are described individually below.

1. AHBA\_n4\_diffExpr Output of the cortical differential expression analyses for each network, in the 4 AHBA donors with left-hemisphere only data. The data in this tab can be used to create the gene list given in "n4\_cortical\_DEX\_genes".

2. AHBA\_n4\_diffExpr\_geneList 2,664 unique genes that were positively differentially expressed across cortical networks of the 4 AHBA donors with left-hemisphere only data. The statistical threshold for differential expression corresponded to FDR B&H  $p < 0.01$  (i.e. no minimum fold change threshold was applied), although only positively differentially expressed genes were examined.

3. AHBA\_n6\_diffExpr\_Cort Output of the cortical differential expression analyses for each network, in all 6 AHBA donors.

4. AHBA\_n6\_diffExpr\_Cort\_geneList Unique genes that were positively differentially expressed across cortical networks of all 6 AHBA donor. The statistical threshold for differential expression corresponded to FDR B&H  $p < 0.01$  (i.e. no minimum fold change threshold was applied), although only positively differentially expressed genes were examined.

5. AHBA\_n6\_diffExpr\_Cort\_Counts Significant differentially expressed genes in the 6 AHBA donors, grouped by cortical network

6. AHBA\_n6\_diffExpr\_Striatum Output of the striatal differential expression analyses for each network, in all 6 AHBA donors.

7. AHBA\_n6\_diffExpr\_Striatum\_Count Significant differentially expressed genes in the 6 AHBA donors, grouped by striatal network.

8. AHBA\_CortStriat\_Overlap Genes that are differentially expressed within both the cortical and striatal aspects of a given cortico-striatal network.

9. ToppGene\_limbic\_n505 Enrichment output from "<https://toppgene.cchmc.org/enrichment.jsp>" of the 505 genes that are positively differentially expressed in both limbic cortex and limbic striatum.

10. ToppGene\_sommot\_n108 Enrichment output from "<https://toppgene.cchmc.org/enrichment.jsp>" of the 108 genes that are positively differentially expressed in both som/mot cortex and som/mot striatum.

**11. mrna\_corrmat**

The cortico-cortical transcriptional correlations across 59 regions that contained at least 2 samples from each bi-hemispheric AHBA donor (10021/9861). These values were used to produce Figure 1C. The genes examined correspond to the 2,664 genes documented in "AHBA\_n4\_diffExpr\_geneList".

**12. fcMRI\_corrmat** The cortico-cortical resting-state correlations across 59 regions that contained at least 2 samples from each bi-hemispheric HBA donor. Data were from 1000 healthy adult subjects used by Yeo and colleagues (2011).

**13. GTEEx\_striatal\_diffExpr** Differential expression of GTEEx striatal data comparing Nucleus Accumbens samples to putamen and caudate samples.

**14. Brainspan\_cortLimbic\_diffExpr** Differential expression of Brainspan cortical data comparing limbic cortex to 8 comparison regions.

**15. Brainspan\_cortSomMot\_diffExpr** Differential expression of Brainspan cortical data comparing som/mot cortex to 7 comparison regions.

**16. Blueprint\_striatal\_diffExpr** Differential expression of NIH Blueprint atlas striatal data comparing macaque Nucleus Accumbens samples to putamen and caudate samples.

**17. Bernard\_cortLimbic\_diffExpr** Differential expression of Bernard macaque cortical data comparing macaque limbic cortex to the rest of the brain.

**18. Bernard\_cortSomMot\_diffExpr** Differential expression of Bernard macaque cortical data som/mot cortex to the rest of the brain.

**19. Limbic\_cellType** Genes out of the limbic network genes that show 1.5 log<sub>2</sub> enrichment in one of 7 cell types in mouse cortex, using data from Zhang et al. 2014.

**20. Limbic\_layerSpecific** Genes out of the 394 limbic network genes that are enriched in layers 2/3 vs 5/6 in macaque ACC and OFC ( $q < 0.05$ ). Negative log<sub>2</sub>FC fold change indicates greater expression in layers 5/6.

**21. MRNA\_cortstriat\_cors** Spearman correlation of gene expression for each striatal seed region and each of 73 cortical regions, using the gene set in 'n6\_cortical\_DEX\_genes'

**22. rsfcMRI\_cortstriat\_cors** Pearson correlations between each striatal seed region and each of 73 cortical regions, using resting-state data from 1000 healthy adult individuals (Choi et al., 2012).
